# Supplementary material
Source: publisher figshare collection journal article supplement (https://rs.figshare.com/ndownloader/files/38859065)
Supplement: Supplementary file 1 [file 38859065]

# Supplementary Material: Modelling Aotearoa New Zealand’s COVID-19 Protection Framework and the transition away from the elimination strategy

This appendix includes a detailed description of the model used for the B.1.617.2 (Delta) variant of SARS-CoV-2 in the New Zealand population. We model transmission of SARS-CoV-2 in the community using a stochastic age-structured branching process model (Steyn et al., 2022) in a partially vaccinated population. The model is parameterised to represent the Delta variant, which at the time the modelling was undertaken was the dominant variant globally and in New Zealand. Infected individuals are categorised as either clinical or subclinical, with the clinical fraction increasing with age. Subclinical individuals are assumed to be as infectious as clinical individuals (Byambasuren et al., 2020; Davies et al., 2020). Clinical individuals are assigned a symptom onset time which is Gamma distributed from exposure time with mean 5.5 days and s.d. 2.3 days (Lauer et al., 2020). In the absence of interventions, we assume generation times follow a Weibull distribution with mean 5.05 days and s.d. 1.9 days (Ferretti et al., 2020). All parameter values used in our model can be found in Supp. Tables S1, S2 and S3.

This appendix also includes an extensive sensitivity analysis on several of the assumed model parameters. Results of the sensitivity analysis can be found in Supp. Table S6 and Supp. Figure S2.

*Test-trace-isolate-quarantine system model*

A test, trace, isolate, quarantine (TTIQ) system provides an additional reduction in transmission. We assume that, independently of contact tracing, the probability that an infected individual is confirmed as a case a result of symptom-triggered testing and test sensitivity is 45% for clinical individuals and 0% for subclinical individuals. There is a delay between symptom onset and detection that is assumed to be exponentially distributed with mean 4 days. We assume that the detection rate for clinical individuals is the same for vaccinated and non-vaccinated individuals and across all age groups. Once an infection is detected, the individual is assumed to be immediately isolated, resulting in an 80% transmission reduction. Some transmission may still happen within the household and isolation compliance is not perfect, hence we don’t model isolation as 100% effective in reducing onward transmission. Contact tracing parameters are dependent on the number of daily cases. If the seven-day rolling average number of daily detected cases remains below 100 cases per day (contact tracing capacity) for 12 consecutive days, a proportion of secondary infections of a confirmed case are identified via contact tracing and quarantined with a mean of 3 days from detection of the index case. This applies to clinical and subclinical contacts. If the number of daily detected cases exceed the contact tracing capacity, no secondary infections can be traced and quarantined (although they may still be detected as a result of symptom-triggered testing). Individuals in quarantine (i.e. asymptomatic or pre-symptomatic traced contacts) are assumed to have a 50% reduction in transmission. Individuals in isolation (i.e. confirmed cases and symptomatic traced contacts) are assumed to have an 80% reduction in transmission.

In our results, we report the percentage reduction in transmission as a result of TTIQ. We calculate this as the relative reduction in the reproduction number of individual as a result of quarantine and isolation:

averaged over all infected individuals, where and are the fraction of the transmission kernel (the probability density function of the number of infection events required to link a pair of cases) that falls in the quarantine and isolation period respectively for individual .

*Age-structured transmission model*

The stochastic model tracks the number of infections in the community. The population is divided into 15 five-year age bands, plus an over-75-year-old age band. The relative contact rate within each and between age groups are defined by a matrix as in (Steyn et al., 2022). A next-generation matrix () defines the average number of individuals in group that will be infected by a single infectious individual in group over their whole infectious period given a fully susceptible population:

where *M* is the contact matrix describing mixing rates between age groups (Steyn et al., 2022), is the relative susceptibility to infection of age group , is the fraction of infections in age group that are clinical, and is the relative infectiousness of subclinical individuals. The basic reproduction number of the age-structured model is the dominant eigenvalue of the next generation matrix, denoted . In model simulations, the value of the constant is chosen to give the desired value of . We assume , approximately representing the Delta variant of SARS-CoV-2 (Kang et al., 2021; Zhang et al., 2021).

The number of unvaccinated people in age group and the number of vaccinated people in age group who are infected by clinical individual between time and are a Poisson distributed random variables with respective means:

|  | (1) |
| --- | --- |
|  |

where:

- is a gamma distributed random variable with mean 1 and variance representing individual heterogeneity in transmission (Lloyd-Smith et al., 2005). We set which represents a moderate level of over-dispersion consistent with estimates for SARS-CoV-2 transmission patterns (James et al., 2021; Riou & Althaus, 2020).
- represents the effect of quarantine or isolation on the transmission rate of individual at time and is equal to 1 if individual is not in quarantine/isolation at time , equal to if individual is in quarantine, and equal to if individual is in isolation.
- is the probability density function of the assumed generation time distribution and is the time individual was infected.
- is the next generation matrix for clinical individuals and is the age group of individual .
- is an indicator variable that is equal to 1 is individual is fully vaccinated at the time they became infected and 0 otherwise and are the fractions of age group that are unvaccinated and fully vaccinated respectively and have not previously been infected at time .
- and are vaccine effectiveness against infection and against transmission given infection parameters, presented in Supplementary Table S1

The expressions for above are multiplied by if individual is subclinical. Note that the factor means that, in the absence of control measures, the total number of people infected by a randomly selected individual has a negative binomial distribution with mean and variance (Lloyd-Smith et al., 2005)

At each daily time step, the susceptible compartments and are depleted according to the number of new infections that occurred in that compartment. Prior infection is assumed to provide complete immunity against re-infection for the duration of the simulation.


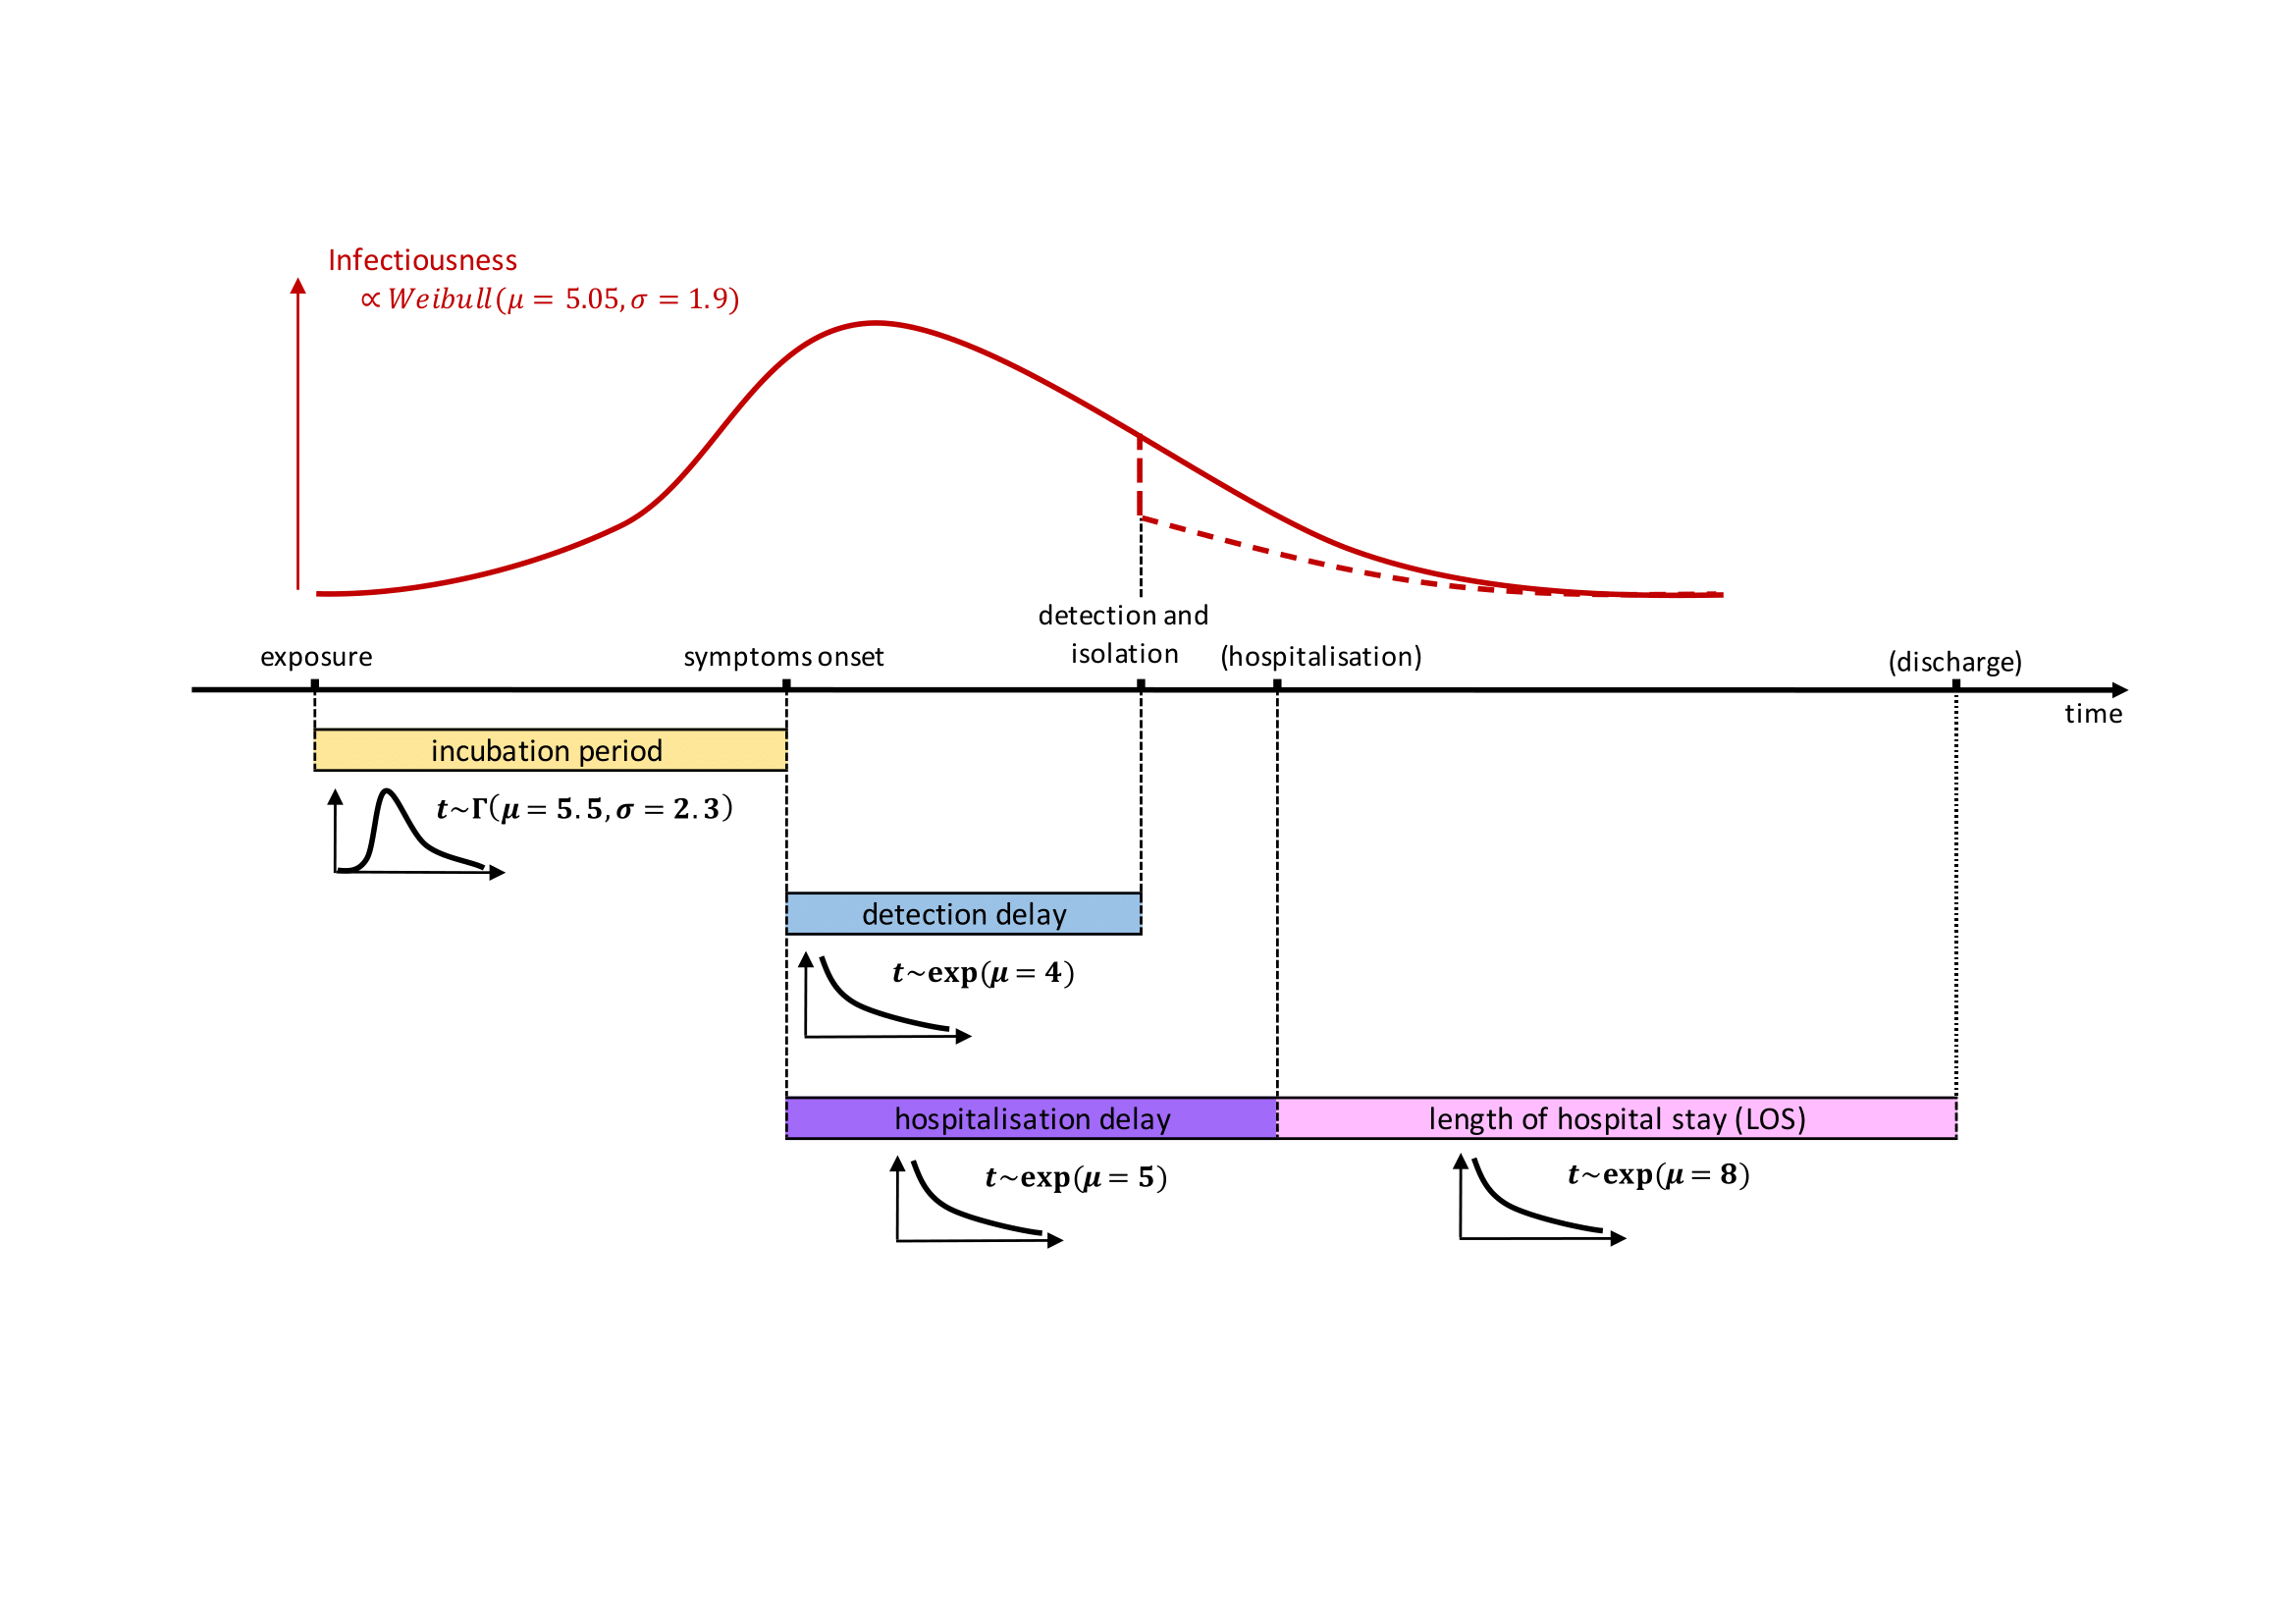


**Supplementary Figure S1** Timeline showing infectiousness of a case (i.e. probability of transmitting the virus to a contact) as a function of time since infection. Infectiousness is modelled using a Weibull distribution (see Equation (1) and Supp. Table S2) with mean 5.05 days and standard deviation 1.9 days. Case detection through a positive test and isolation happen at the same time. After isolation, infectiousness is reduced to a lower level (red dashed curve, see Supp. Table S2). Subclinical infections are not isolated and follow the shape of the blue curve throughout, but with a lower overall probability of transmission. Note that this diagram does not show the possibility of quarantine through contact tracing, which would also reduce infectiousness.

*Hospitalisation and fatality model*

Age-stratified hospitalisation rates are as in (Herrera-Esposito & de los Campos, 2021) with an additional hazard ratio of 2.26 applied to represent the increased severity of the Delta variant relative to the ancestral strain of SARS-CoV-2(Twohig et al., 2022). Fatality rates are based on those of (Herrera-Esposito & de los Campos, 2021), adjusted by an odds ratio of 2.32 for Delta (Fisman & Tuite, 2021) (Supp. Table S3). Clinical individuals in age group *i* with 2 doses of the vaccine are assumed to require hospitalisation with probability where is the vaccine effectiveness against severe disease in breakthrough infections (Supp. Table S1), is the infection to hospitalisation ratio for unvaccinated people in age group (Supp. Table S3), and is the fraction of infections in age group that are clinical. The time between symptom onset and hospitalisation is assumed to be exponentially distributed with mean 5 days. The length of hospital stay is assumed to be exponentially distributed with mean 8 days. Hospitalised cases in age group die with probability where is the infection fatality ratio for unvaccinated cases in age group *i*.

*Vaccination coverage and effectiveness*

Vaccine effectiveness assumptions are as shown in Supp. Table S1. All vaccinated individuals have an overall transmission reduced by and an overall probability of developing severe disease reduced by . We use a leaky vaccine model as opposed to an all-or-nothing vaccine model, where a proportion of vaccinated individuals are completely immunised and a proportion are completely susceptible (Moore et al., 2021). Reality may be somewhere between these idealised models (i.e. there may be some individual heterogeneity in the level of protection provided by the vaccine but not as extreme as all-or-nothing). The all-or-nothing and the leaky vaccine model behave similarly when the proportion of the population with immunity from prior infection is relatively small. Waning of immunity from prior infection is ignored.

**Supplementary Table S1.** Vaccine effectiveness parameters against Delta for the Pfizer-BioNTech vaccine after 2 doses. Source: (Public Health England, 2021)

| **Parameter** | **Value** |
| --- | --- |
| Effectiveness against infection () | 70% |
| Effectiveness against transmission given infection () | 50% |
| Effectiveness against severe disease given infection () | 80% |
| Implied overall transmission reduction | 85% |
| Implied overall protection against severe disease | 94% |

**Supplementary Table S2.** Other parameter values used in the “baseline” scenario of our model.

| **Parameter** | **Value** |
| --- | --- |
| Reproduction number excluding effects of immunity |  |
| Incubation period | Mean 5.5 days, s.d. 2.3 days |
| Generation interval | Mean 5.05 days, s.d. 1.9 days |
| Relative infectiousness of subclinical individuals |  |
| Heterogeneity in individual reproduction number |  |
| Probability of detection for clinical individuals |  |
| Probability of a contact of a confirmed case being traced |  |
| Relative transmission rate for individuals in quarantine |  |
| Relative transmission rate for individuals in isolation |  |
| Time from symptom onset to isolation | Mean 4.0 days, s.d. 4.0 days |
| Time from case detection to quarantine of contacts | Mean 2.0 days, s.d. 1.2 days |
| Time form symptom onset to hospital admission | Mean 5.0 days, s.d. 5.0 days |
| Length of hospital stay | Mean 8.0 days, s.d. 8.0 days |

**Supplementary Table S3.** Age-specific parameter values used in the “baseline” scenario of our model.

| **Age (yrs)** | **0-4** | **5-9** | **10-14** | **15-19** | **20-24** | **25-29** | **30-34** | **35-39** | **40-44** | **45-49** | **50-54** | **55-59** | **60-64** | **65-69** | **70-74** | **75+** |
| --- | --- | --- | --- | --- | --- | --- | --- | --- | --- | --- | --- | --- | --- | --- | --- | --- |
| 2nd dose vax cov*(%) | 0 | 0 | 62 | 88 | 83 | 84 | 90 | 91 | 93 | 90 | 93 | 92 | 94 | 95 | 96 | 96 |
| Pr(clinical) (%) | 54.4 | 55.5 | 57.7 | 59.9 | 62 | 64 | 65.9 | 67.7 | 69.5 | 71.2 | 72.7 | 74.2 | 75.5 | 76.8 | 78 | 80.1 |
| Pr(hosp) (%) | 0.19 | 0.29 | 0.41 | 0.61 | 0.88 | 1.26 | 1.84 | 2.69 | 3.8 | 5.56 | 8.17 | 11.37 | 16.15 | 22.17 | 30 | 48.97 |
| Pr(death) (%) | 8E-04 | 0.002 | 0.003 | 0.01 | 0.01 | 0.02 | 0.05 | 0.09 | 0.17 | 0.35 | 0.67 | 1.29 | 2.52 | 4.74 | 8.81 | 26.65 |
| Susceptibility** | 0.46 | 0.46 | 0.45 | 0.56 | 0.8 | 0.93 | 0.97 | 0.98 | 0.94 | 0.93 | 0.94 | 0.97 | 1 | 0.98 | 0.9 | 0.86 |
| Popn (1000s) | 306 | 327 | 335 | 315 | 337 | 378 | 380 | 338 | 311 | 328 | 329 | 326 | 295 | 251 | 217 | 339 |
| * New Zealand’s 1st dose vaccination coverage as of 3rd November 2021, scaled up to obtain 90% national coverage | | | | | | | | | | | | | | | | |
| **Susceptibility for age group is stated relative to susceptibility for age 60-64 years (Davies et al., 2020).  Age-dependent rates of clinical disease are based on (Hinch et al., 2021). | | | | | | | | | | | | | | | | |

# *Traffic lights trigger points*

# Supp. Table S4 presents the average number of hospital beds occupied when a given trigger point for the number of cases is met can be calculated as a model output, which enables the trigger points for the low, medium and high tolerance scenarios to be directly compared.

|  |  | | Very low tolerance* | Low tolerance | Medium tolerance | High tolerance |
| --- | --- | --- | --- | --- | --- | --- |
| escalation criteria | → O | cases | 10 | 50 | 200 |  |
| hosp beds | 4 | 20 | 70 | 100 |
| → R | cases | 25 | 100 | 400 |  |
| hosp beds | 9 | 40 | 140 | 200 |
| → E | cases | 50 | 300 | 1200 |  |
| hosp beds | 20 | 110 | 430 | 600 |
| relaxation criteria | → G | cases | 0 | 0 | 100 |  |
| hosp beds | 0 | 0 | 40 | 50 |
| → O | cases | 10 | 75 | 300 |  |
| hosp beds | 4 | 30 | 110 | 150 |
| → R | cases | 30 | 200 | 800 |  |
| hosp beds | 10 | 70 | 290 | 400 |

**Supplementary Table S4.** Trigger criteria used to raise/lower traffic light settings for low, medium, and high tolerance outbreak management responses (black text), together with the average model output number of hospital beds occupied (red text) at the time when the corresponding trigger for the number of cases was met. The high tolerance response uses hospitalisations as the trigger to move between traffic settings, whereas the other responses use reported cases. These results are provided to enable direct comparison of the criteria for moving between traffic light settings,
*The “very low tolerance” triggers were only used for the border and community seed sensitivity analysis.

# **Derivation of “toy border model”**

Suppose there is a pre-defined tolerance for prevalence of active community infections. When rises above , stringent control measures are imposed resulting in an effective reproduction number of . When falls below some proportion of the tolerance , control measures are relaxed and the effective reproduction number is . The parameter is needed to avoid instantaneous alternation between escalation and relaxation of control measures; however we will take the limit to derive an idealised expression for the average proportion of time spent with control measures imposed.

In a standard SIR modelling framework, the effective reproduction number is related to the epidemic growth rate via

(2)

where is the mean generation interval (Wallinga & Lipsitch, 2007).

If there are *b* additional infections per unit time introduced into the community via the border, then prevalence is governed by the differential equation

(3)

During periods when control measures are relaxed, the prevalence at the start of the period is by definition, and subsequently grows according to

(4)

The time taken for prevalence to rise above the threshold for imposition of control measures is therefore

During periods when control measures are imposed, the prevalence at the start of the period is by definition, and subsequently declines according to

(5)

The time taken for prevalence to fall below the threshold for relaxation of control measures is therefore

If is close to 1, the above expressions for and may be written as a Taylor series in:

(6)

(7)

Over a sufficiently long time window, the approximate average proportion of time spent with control measures in places is therefore

(8)

where we have neglected terms of order and higher.

Writing this in terms of reproduction numbers and instead of growth rates and gives

(9)

Note that for this result to be valid requires that . If , the large number of border cases means that prevalence will continue to increase above even with control measures in place 100% of the time.

Converting the threshold for prevalence to an approximate corresponding threshold for incidence of new infections per day via yields the equation in the main text for .

# **Sensitivity analysis**

In addition to the scenarios presented in the main text, we explore the effects of changing model assumptions for community case isolation, the probability of case detection, the effectiveness of control measures, vaccine effectiveness, the capacity of the contact tracing system, and the risk of hospitalisation (Supp. Table S5).

From each simulation, we output the number of infections, detected cases, hospital admissions and deaths, and the time spent under different traffic light settings. All simulations were run for a one year period and results were averaged over 50 independent simulations of the stochastic model for each set of parameters.

**Supplementary Table S5** Parameters used in the sensitivity analysis

| **Parameters** | **Baseline values** | **Scenarios tested** |
| --- | --- | --- |
| Comm. cases isolation effectiveness (%) | 100 | 50 |
| Probability of case detection | 0.45 | 0.30 |
| Reduction in transmission (%) at G/O/R/E1 | 10/20/30/60 | 0/10/20/60 |
| Vaccine effectiveness (ei/et/ed2 )(%) | 70/50/80 | 50/40/80 |
| National vaccination coverage (%) | 90 | 95 |
| Contact tracing | Capacity3 = 100 cases per day pTrace4=70 | 1.No cap, pTrace=70  2.Cap=250 cases per day, pTrace=70  3.Cap=100 cases per day, pTrace=30  4.No contact tracing |

1 reduction in transmission a G/O/R/E – Green/Orange/Red and Emergency setting

2 ei/et/ed – Effectiveness of vaccine against infection/transmission given infection/disease given infection

3 Capacity – Contact tracing capacity above which no infections are found by contact tracing compared to 70% before capacity is reached.

4 pTrace – percentage of infections found by contact tracing before capacity is reached

*Sensitivity analysis of community case isolation effectiveness*

Reducing the effectiveness of case isolation in the community from 100% to 50% reduces the effectiveness of TTIQ and leads to increased transmission. As a result, the trigger points for escalating control measures are met sooner (and those for relaxing are met later), increasing the amount of time spent under more stringent settings (Supp. Fig. S2c, Supp. Table S6.C). For example, in a low tolerance response, the time spent in the emergency setting increases from 15% to 21% (one extra month in the emergency setting) relative to the baseline scenario. The increase in time in the emergency setting is not as profound for the medium and high tolerance response. The number of infections, hospitalisations and deaths are higher than in the baseline scenario. However, this increase is offset to a large extent by the more stringent public health response described above, keeping the epidemic to pre-defined tolerances.

Sensitivity analysis of *contact tracing system capacity*

Under a low tolerance response, increasing contact tracing capacity from 100 cases to 250 cases per day increases the effect of TTIQ on transmission from 8% to 16%, which leads to fewer infections and hospitalisations and much less time spent in emergency setting (Supp. Table S6.G2). However, it has almost no effect on health outcomes or time spent in lockdown under a medium or high tolerance response. This is because the number of cases is almost always above 250 cases per day, so contact tracing is always performing at the reduced level in these scenarios. With no assumed limit to contact tracing capacity, there is a clear decrease in the number of infections and hospitalisations. Under a low and medium tolerance response, the time spent in red and emergency slightly increases relative to the baseline scenario as a higher proportion of infections are detected (about 50% as compared to 30% under the baseline setting) (Supp. Fig. S2g, Supp. Table S6.G1). Under a high tolerance response, the time spent in emergency decreases, but the time spent in red setting increase.

Reducing the proportion of contacts of a confirmed case who are via contact tracing from 70% to 30% has almost no effect on infections, hospitalisations or time spent in emergency setting relative to the baseline scenario (Supp. Table S6.G3) under the low and medium response. This is because the number of cases quickly exceeds the contact tracing capacity (set to 100 cases) in all scenarios. It resulted in more infections, cases, and hospitalisations, but had no effect on time spent in emergency setting under a high tolerance response.

Sensitivity analysis of p*robability of case detection*

For the low and medium tolerance scenarios, a reduction in the probability of case detection, i.e. the probability of individuals seeking a test and testing positive, from 45% to 30% corresponds to a slower response to the increase in cases and a delayed move to higher traffic lights, leading to more infections, hospitalisations and deaths over the year (Supp. Fig. S2d, Supp. Table S6.D).

Interestingly, reducing the probability of case detection resulted in fewer infections and deaths under a high tolerance strategy than under the medium tolerance strategy. Essentially, the high tolerance strategy became more effective at controlling the spread of COVID-19 because the higher tolerance scenario uses hospital beds as a metric of demand on the healthcare system (as opposed to case numbers in the low and medium tolerance response), which is not as affected by the lower probability of case detection. This suggests that the low and medium tolerance scenario display a higher sensitivity to the probability of case detection.

Sensitivity analysis of t*raffic light control effectiveness*

Reducing the effectiveness of public health measures under the different traffic light settings in reducing transmission of the virus leads to a large increase in infections, hospitalisations and deaths (Supp. Fig. S2e, Supp. Table S6.E). The time spent in emergency setting is doubled under a low tolerance response (about one third of the year in emergency setting) and almost tripled under a medium and high tolerance response (2 months in emergency) relative to the baseline parameter settings.

Sensitivity analysis of v*accine effectiveness*

Reducing vaccine effectiveness against infection from 70% to 50% and against transmission from 50% to 40% causes a more than a threefold increase in hospitalisations and about a twofold increase in the number of deaths (Supp. Fig. S2f, Supp. Table S6.F). The time spent in the emergency setting increases to about half of the year under a medium or high tolerance response, and about two thirds of the year under a low tolerance response.

Sensitivity analysis of *vaccination coverage*

Increasing the national vaccination coverage from 90% to 95% results in a significant drop in all public health outcomes and in the time spent in the red and emergency settings, with a near two-fold reduction in the number of hospitalisations and deaths (Supp. Fig. S2h, Supp. Table S6.H).


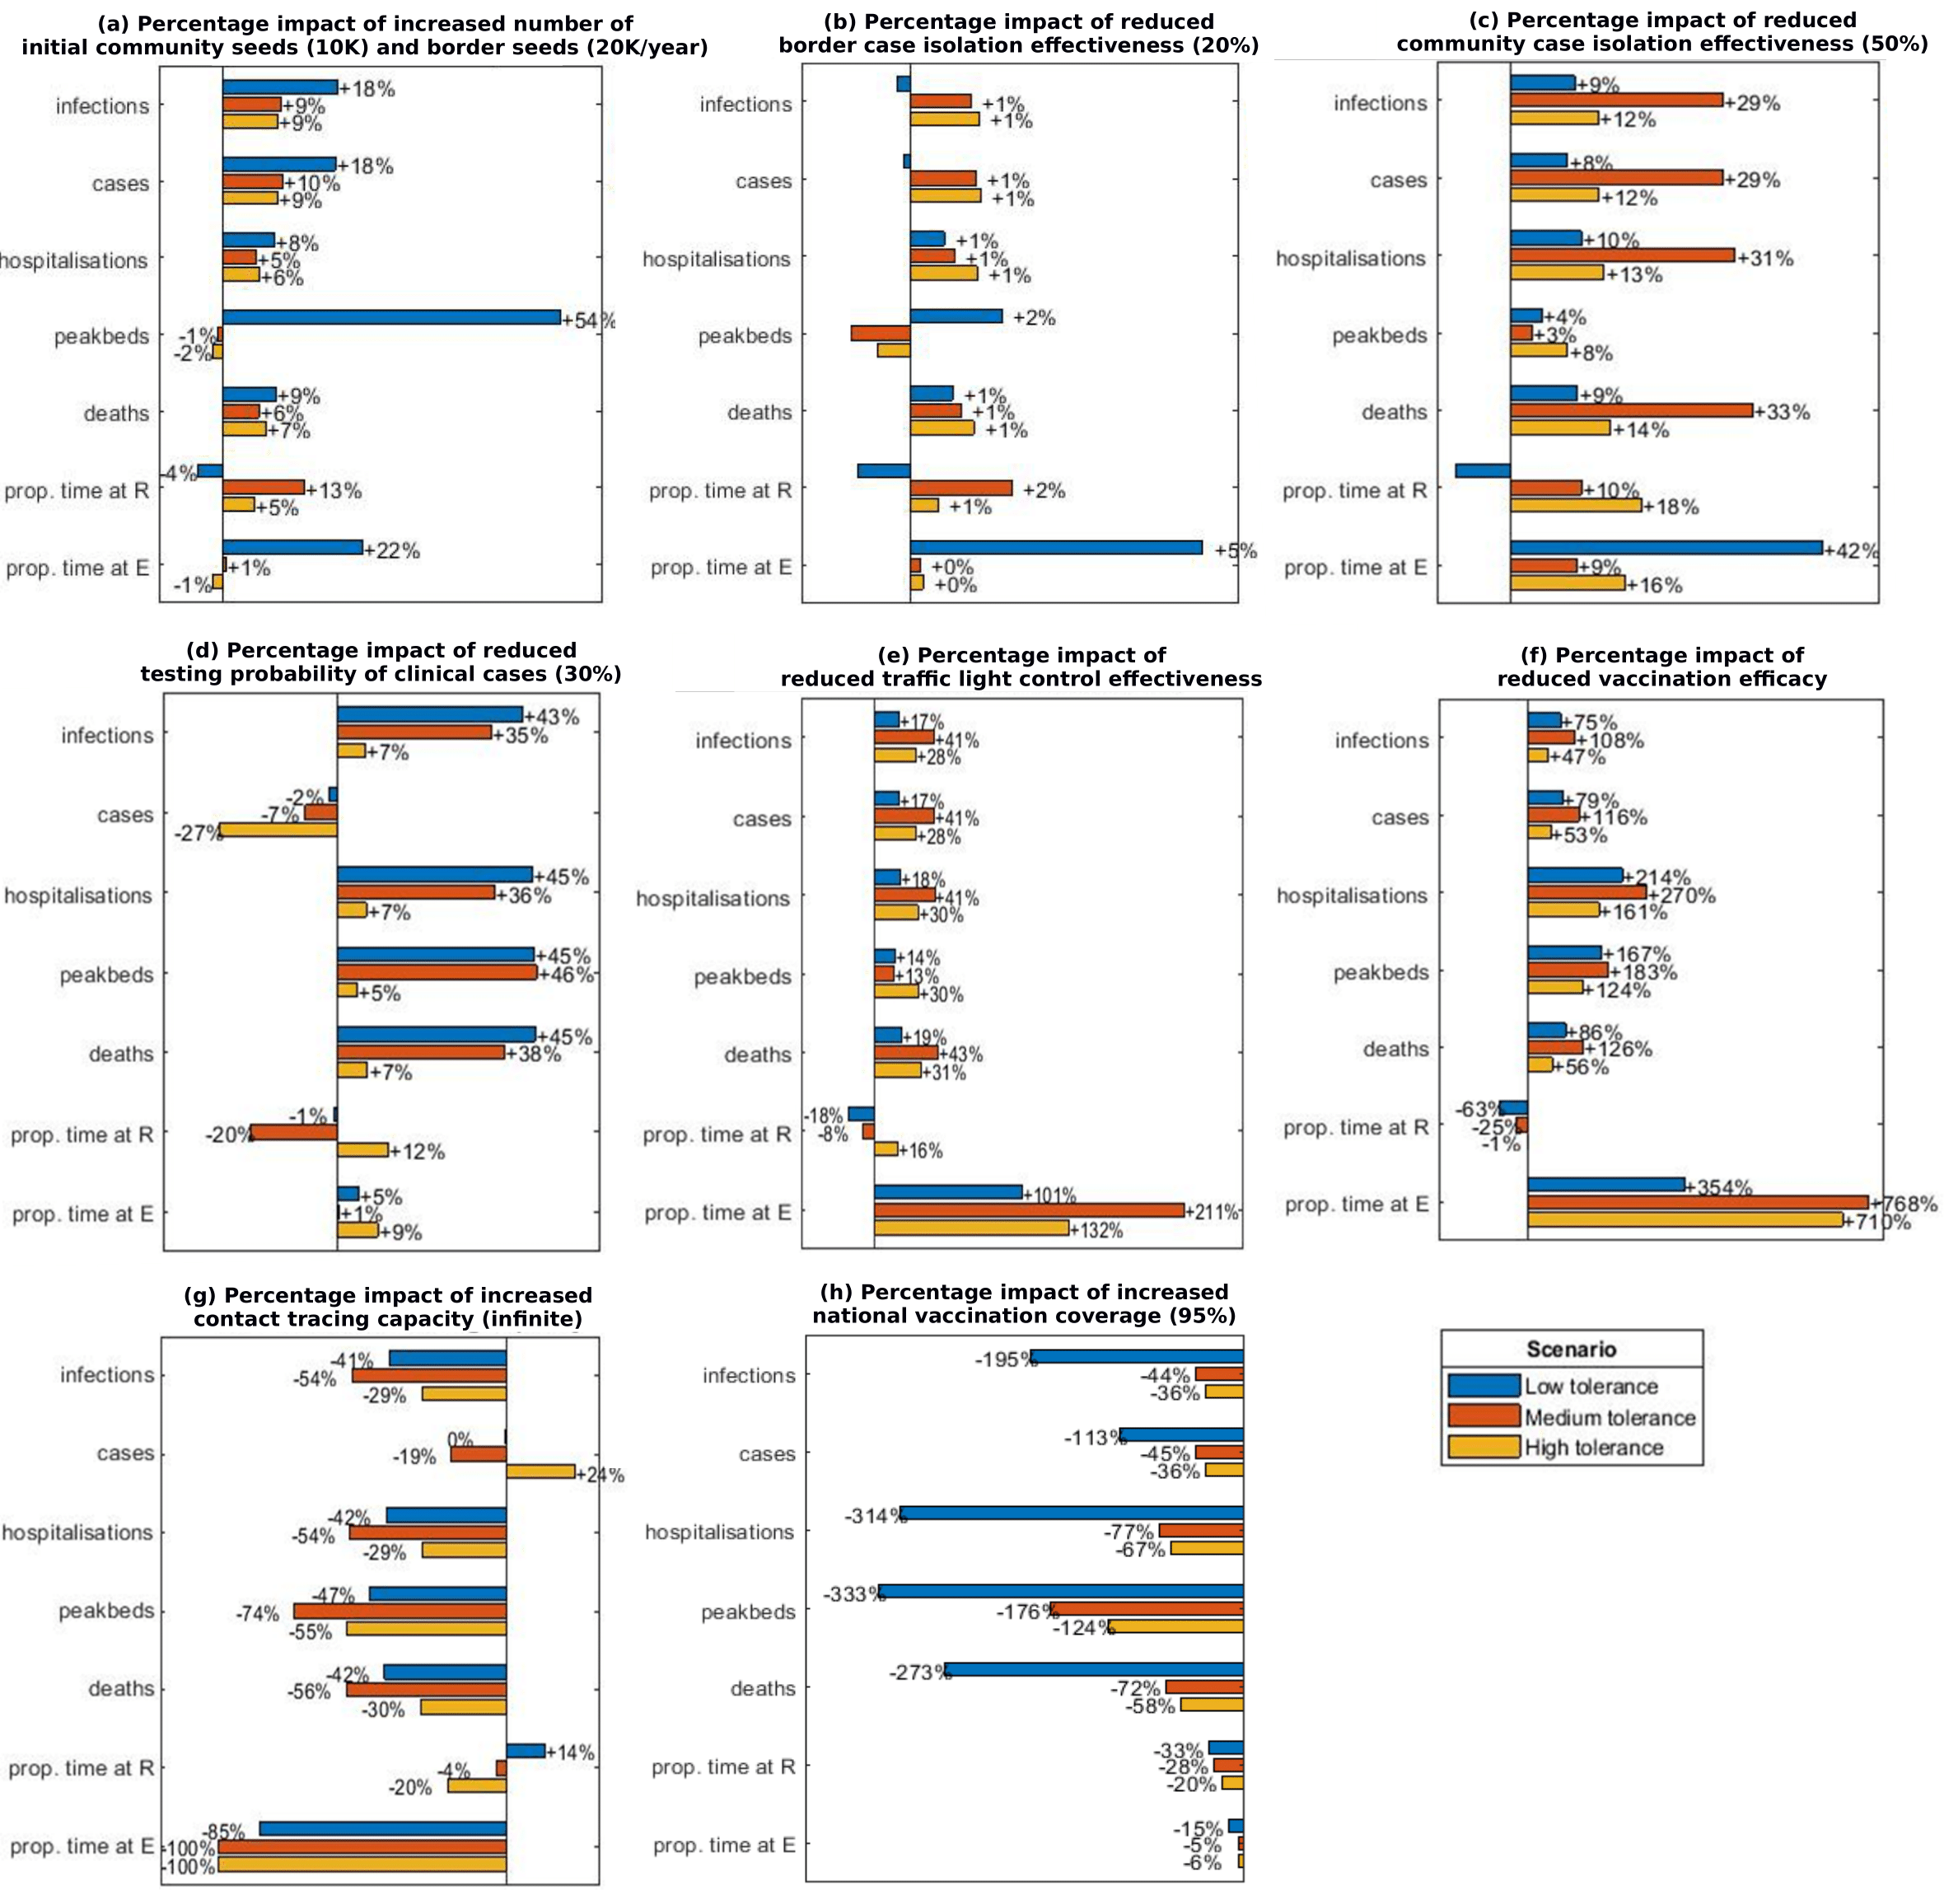


**Supplementary Figure S2** Percentage impact of different model parameter settings compared to the baseline (Table 2), for the low (blue), medium (red) and high (yellow) tolerance scenarios.

**Supplementary Table S6**: Median number of infections, detected cases, hospitalisations, peak hospital occupancy and deaths over a year under the low, medium and high tolerance outbreak management response for all scenarios tested. The G, O, R, and E columns indicate the median percentage time spent in each of the traffic light setting (green, orange, red and emergency). The TTIQeff indicate the reduction in transmission as a result of the test, trace, isolate, quarantine system.

| **scenario** | **infections** | | | | **cases** | **hospitalisations** | | | | | **peak beds** | **deaths** | | | | | | **G** | | | **Y** | | | | **R** | | | | **E** | | | **TTIQeff** | | | | | | | |
| --- | --- | --- | --- | --- | --- | --- | --- | --- | --- | --- | --- | --- | --- | --- | --- | --- | --- | --- | --- | --- | --- | --- | --- | --- | --- | --- | --- | --- | --- | --- | --- | --- | --- | --- | --- | --- | --- | --- | --- |
| *BASELINE SCENARIO* |  | | | |  |  | | | | |  |  | | | | | |  | | |  | | | |  | | | |  | | |  | | | | | | | |
| Very low tolerance | 32,000 | | | | 13,000 | 400 | | | | | 40 | 50 | | | | | | 0% | | | 3% | | | | 82% | | | | 15% | | | 12% | | | | | | | |
| Low tolerance | 215,000 | | | | 66,000 | 2,900 | | | | | 130 | 410 | | | | | | 0% | | | 0% | | | | 85% | | | | 15% | | | 8% | | | | | | | |
| Medium tolerance | 553,000 | | | | 165,000 | 7,600 | | | | | 470 | 1,100 | | | | | | 0% | | | 23% | | | | 72% | | | | 5% | | | 8% | | | | | | | |
| High tolerance | 684,000 | | | | 204,000 | 9,500 | | | | | 650 | 1,390 | | | | | | 7% | | | 38% | | | | 49% | | | | 6% | | | 8% | | | | | | | |
| *A1. Border cases = 10K* | | | |  | | | |  |  | | | | |  | | | | | |  | |  | | | |  | | | |  | | | |  | | | | |
| Very low tolerance | 37,000 | | | | 15,000 | 400 | | | | | 40 | 50 | | | | | | 0% | | | 0% | | | | 78% | | | | 22% | | | 12% | | | | | | | |
| Low tolerance | 217,000 | | | | 66,000 | 2,900 | | | | | 130 | 400 | | | | | | 0% | | | 0% | | | | 84% | | | | 16% | | | 8% | | | | | | | |
| Medium tolerance | 551,000 | | | | 165,000 | 7,500 | | | | | 470 | 1,090 | | | | | | 0% | | | 21% | | | | 75% | | | | 5% | | | 8% | | | | | | | |
| High tolerance | 690,000 | | | | 206,000 | 9,500 | | | | | 650 | 1,390 | | | | | | 6% | | | 38% | | | | 50% | | | | 6% | | | 8% | | | | | | | |
| *A2. Border cases = 20K* | | | |  | | | |  |  | | | | |  | | | | | |  | |  | | | |  | | | |  | | | |  | | | | |
| Very low tolerance | 46,000 | | | | 17,000 | 400 | | | | | 40 | 50 | | | | | | 0% | | | 0% | | | | 61% | | | | 39% | | | 11% | | | | | | | |
| Low tolerance | 223,000 | | | | 67,000 | 2,800 | | | | | 130 | 400 | | | | | | 0% | | | 0% | | | | 84% | | | | 16% | | | 8% | | | | | | | |
| Medium tolerance | 554,000 | | | | 166,000 | 7,400 | | | | | 460 | 1,080 | | | | | | 0% | | | 19% | | | | 76% | | | | 5% | | | 8% | | | | | | | |
| High tolerance | 703,000 | | | | 210,000 | 9,600 | | | | | 650 | 1,410 | | | | | | 6% | | | 38% | | | | 50% | | | | 6% | | | 8% | | | | | | | |
| *A3. Community seed cases = 10K, border cases = 10K* | | | | | | | | | | | | |  | | |  | | | | | | | |  | | | | | | | | |  | | | | | | | |  | | |  | |  | |
| Very low tolerance | 93,000 | | | | 32,000 | 1,100 | | | | | 200 | 150 | | | | | | 0% | | | 0% | | | | 75% | | | | 25% | | | 10% | | | | | | | |
| Low tolerance | 245,000 | | | | 75,000 | 3,200 | | | | | 210 | 450 | | | | | | 0% | | | 0% | | | | 82% | | | | 18% | | | 8% | | | | | | | |
| Medium tolerance | 588,000 | | | | 176,000 | 8,000 | | | | | 470 | 1,170 | | | | | | 0% | | | 12% | | | | 83% | | | | 5% | | | 8% | | | | | | | |
| High tolerance | 725,000 | | | | 217,000 | 9,900 | | | | | 640 | 1,460 | | | | | | 0% | | | 43% | | | | 51% | | | | 6% | | | 8% | | | | | | | |
| *A4. Community seed cases = 10K, border cases 20K* | | | | | | | | | |  | | | | |  | |  | | | | | | | | | |  | | | | | | | |  | |  | | | | |  | | |  | |
| Very low tolerance | 103,000 | | | | 34,000 | 1,100 | | | | | 210 | 150 | | | | | | 0% | | | 0% | | | | 60% | | | | 40% | | | 9% | | | | | | | |
| Low tolerance | 257,000 | | | | 78,000 | 3,200 | | | | | 200 | 450 | | | | | | 0% | | | 0% | | | | 82% | | | | 18% | | | 8% | | | | | | | |
| Medium tolerance | 604,000 | | | | 181,000 | 8,100 | | | | | 470 | 1,170 | | | | | | 0% | | | 12% | | | | 83% | | | | 5% | | | 8% | | | | | | | |
| High tolerance | 747,000 | | | | 224,000 | 10,100 | | | | | 640 | 1,490 | | | | | | 0% | | | 44% | | | | 51% | | | | 6% | | | 8% | | | | | | | |
| *B. Low border cases isolation effectiveness (20%)* | | | | | | | | | |  | | | | |  | |  | | | | | | | | | |  | | | | | | | |  | |  | | | | |  | | |  | |
| Low tolerance | 216,000 | | | | 66,000 | 2,900 | | | | | 130 | 420 | | | | | | 0% | | | 0% | | | | 84% | | | | 16% | | | 8% | | | | | | | |
| Medium tolerance | 557,000 | | | | 167,000 | 7,700 | | | | | 470 | 1,110 | | | | | | 0% | | | 20% | | | | 75% | | | | 5% | | | 8% | | | | | | | |
| High tolerance | 689,000 | | | | 206,000 | 9,600 | | | | | 650 | 1,400 | | | | | | 6% | | | 38% | | | | 50% | | | | 6% | | | 8% | | | | | | | |
| *C. Low community cases isolation effectiveness (50%)* | | | | | | | | | | |  | | |  | | | | |  | | | |  | | | | |  | | |  | | | | | | |  | | | | |
| Low tolerance | 235,000 | | | | 71,000 | 3,200 | | | | | 140 | 450 | | | | | | 0% | | | 0% | | | | 79% | | | | 21% | | | 4% | | | | | | | |
| Medium tolerance | 710,000 | | | | 212,000 | 9,900 | | | | | 490 | 1,460 | | | | | | 0% | | | 14% | | | | 81% | | | | 5% | | | 4% | | | | | | | |
| High tolerance | 762,000 | | | | 228,000 | 10,700 | | | | | 700 | 1,570 | | | | | | 6% | | | 29% | | | | 58% | | | | 7% | | | 4% | | | | | | | |
| *D. Low testing probability (30%)* | | | |  | | | |  |  | | | | |  | | | | | |  | |  | | | |  | | | |  | | | |  | | | | |
| Low tolerance | 308,000 | | | | 65,000 | 4,200 | | | | | 190 | 600 | | | | | | 0% | | | 0% | | | | 84% | | | | 16% | | | 5% | | | | | | | |
| Medium tolerance | 745,000 | | | | 152,000 | 10,400 | | | | | 690 | 1,520 | | | | | | 2% | | | 35% | | | | 59% | | | | 5% | | | 5% | | | | | | | |
| High tolerance | 725,000 | | | | 148,000 | 10,100 | | | | | 680 | 1,480 | | | | | | 6% | | | 32% | | | | 55% | | | | 7% | | | 5% | | | | | | | |
| *E. Low traffic light control effectiveness* | | | | | | | | | |  | | | | |  | |  | | | | | | | | | |  | | | | | | | |  | |  | | | | |  | | |  | |
| Low tolerance | 252,000 | | | | 77,000 | 3,400 | | | | | 150 | 490 | | | | | | 0% | | | 0% | | | | 70% | | | | 30% | | | 8% | | | | | | | |
| Medium tolerance | 774,000 | | | | 231,000 | 10,700 | | | | | 540 | 1,570 | | | | | | 0% | | | 17% | | | | 67% | | | | 15% | | | 8% | | | | | | | |
| High tolerance | 873,000 | | | | 261,000 | 12,300 | | | | | 850 | 1,820 | | | | | | 4% | | | 25% | | | | 57% | | | | 14% | | | 8% | | | | | | | |
| *F. Low vaccination effectiveness (50/40/80)* | | | | | | | | | |  | | | | |  | |  | | | | | | | | | |  | | | | | | | |  | |  | | | | |  | | |  | |
| Low tolerance | 386,000 | | | | 118,000 | 5,300 | | | | | 200 | 780 | | | | | | 0% | | | 0% | | | | 32% | | | | 68% | | | 8% | | | | | | | |
| Medium tolerance | 1,000,000 | | | | 305,000 | 14,100 | | | | | 770 | 2,190 | | | | | | 0% | | | 2% | | | | 60% | | | | 38% | | | 8% | | | | | | | |
| High tolerance | 1,000,000 | | | | 305,000 | 14,100 | | | | | 1,370 | 2,220 | | | | | | 0% | | | 4% | | | | 71% | | | | 25% | | | 8% | | | | | | | |
| *G1. Unlimited contact tracing capacity* | | | | | | | | | |  | | | | |  | |  | | | | | | | | | |  | | | | | | | |  | |  | | | | |  | | |  | |
| Low tolerance | 128,000 | | | | 66,000 | 1,700 | | | | | 70 | 240 | | | | | | 0% | | | 1% | | | | 97% | | | | 2% | | | 17% | | | | | | | |
| Medium tolerance | 256,000 | | | | 133,000 | 3,500 | | | | | 120 | 490 | | | | | | 0% | | | 29% | | | | 71% | | | | 0% | | | 18% | | | | | | | |
| High tolerance | 481,000 | | | | 252,000 | 6,700 | | | | | 290 | 970 | | | | | | 8% | | | 53% | | | | 39% | | | | 0% | | | 18% | | | | | | | |
| *G2. High contact tracing capacity (250)* | | | | | | | | | |  | | | | |  | |  | | | | | | | | | |  | | | | | | | |  | |  | | | | |  | | |  | |
| Low tolerance | 136,000 | | | | 66,000 | 1,800 | | | | | 80 | 250 | | | | | | 0% | | | 0% | | | | 97% | | | | 3% | | | 16% | | | | | | | |
| Medium tolerance | 555,000 | | | | 170,000 | 7,700 | | | | | 470 | 1,110 | | | | | | 0% | | | 24% | | | | 72% | | | | 5% | | | 8% | | | | | | | |
| High tolerance | 679,000 | | | | 206,000 | 9,400 | | | | | 650 | 1,380 | | | | | | 8% | | | 39% | | | | 48% | | | | 6% | | | 8% | | | | | | | |
| *G3. Low proportion of contacts traced (30%)* | | | | | | | | | |  | | | | |  | |  | | | | | | | | | |  | | | | | | | |  | |  | | | | |  | | |  | |
| Low tolerance | 219,000 | | | | 66,000 | 2,900 | | | | | 130 | 410 | | | | | | 0% | | | 0% | | | | 84% | | | | 16% | | | 8% | | | | | | | |
| Medium tolerance | 557,000 | | | | 166,000 | 7,700 | | | | | 470 | 1,110 | | | | | | 0% | | | 20% | | | | 75% | | | | 5% | | | 8% | | | | | | | |
| High tolerance | 690,000 | | | | 206,000 | 9,600 | | | | | 650 | 1,410 | | | | | | 6% | | | 38% | | | | 50% | | | | 6% | | | 8% | | | | | | | |
| *G4. No contact tracing* | | | |  | | | |  |  | | | | |  | | | | | |  | |  | | | |  | | | |  | | | |  | | | | |
| Low tolerance | 222,000 | | | | 66,000 | 3,000 | | | | | 130 | 420 | | | | | | 0% | | | 0% | | | | 84% | | | | 16% | | | 7% | | | | | | | |
| Medium tolerance | 558,000 | | | | 166,000 | 7,700 | | | | | 470 | 1,100 | | | | | | 0% | | | 20% | | | | 76% | | | | 5% | | | 7% | | | | | | | |
| High tolerance | 690,000 | | | | 206,000 | 9,600 | | | | | 650 | 1,400 | | | | | | 6% | | | 38% | | | | 50% | | | | 6% | | | 7% | | | | | | | |
| *H. High vaccination coverage (95%)* | | | | | | | | | | | | | | | | | | | | | | | | | | | | | | | | | | | |
| Low tolerance | | 73,000 | 31,000 | | | | 700 | | | | 30 | 110 | | | | | | 0% | | | 48% | | | | 52% | | | | 0% | | | 8% | | | | | | | |
| Medium tolerance | | 383,000 | 114,000 | | | | 4,300 | | | | 170 | 640 | | | | | | 9% | | | 47% | | | | 44% | | | | 0% | | | 8% | | | | | | | |
| High tolerance | | 504,000 | 150,000 | | | | 5,700 | | | | 290 | 880 | | | | | | 14% | | | 57% | | | | 29% | | | | 0% | | | 8% | | | | | | | |


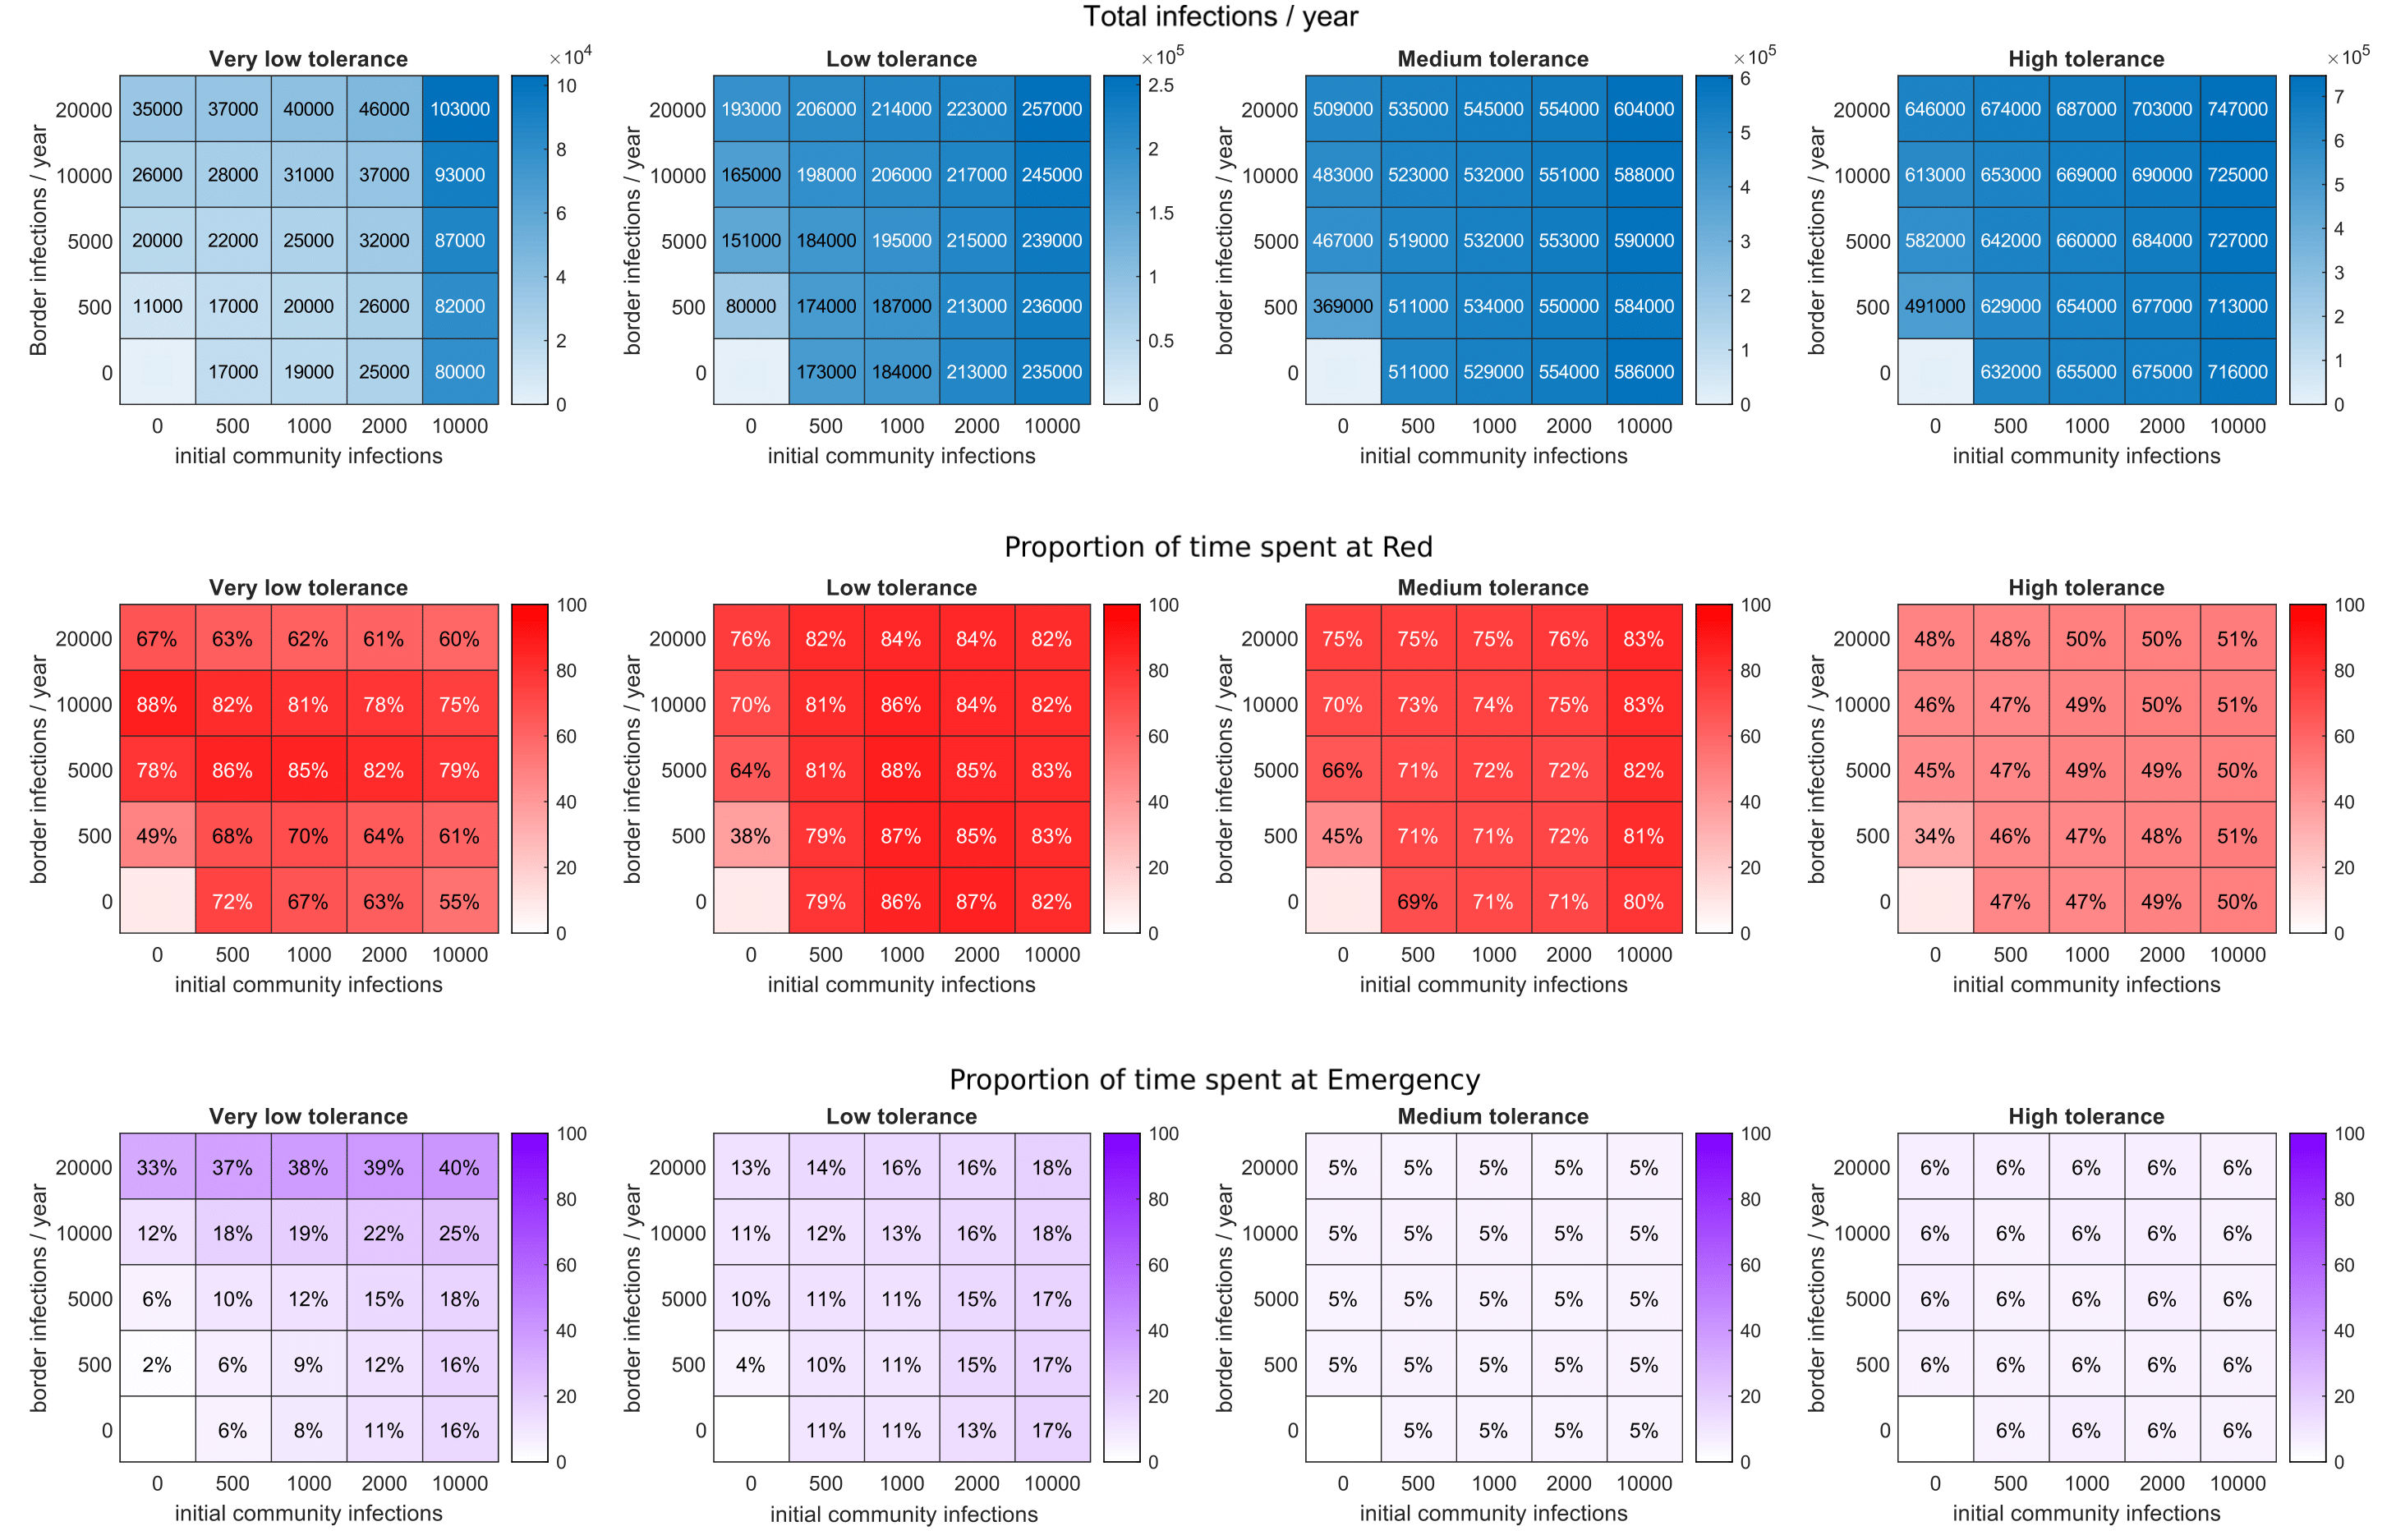


**Supplementary Figure S3** Heatmaps of total infections per year (top row), proportion of time spent in the Red setting (middle row), and proportion of time spent in the Emergency setting (bottom row), for the very low (first column), low (second column), medium (third column), and high (fourth column) tolerance scenarios. Each heatmap was produced through different combinations of initial community seed infections and border infections per year, as described in Table 2.

**References**

Byambasuren, O., Cardona, M., Bell, K., Clark, J., McLaws, M.-L., & Glasziou, P. (2020). Estimating the extent of asymptomatic COVID-19 and its potential for community transmission: Systematic review and meta-analysis. *Official Journal of the Association of Medical Microbiology and Infectious Disease Canada*, *5*, 223–234.

Davies, N. G., Klepac, P., Liu, Y., Prem, K., Jit, M., group, C. C.-19 working, & Eggo, R. M. (2020). Age-dependent effects in the transmission and control of COVID-19 epidemics. *Nature Medicine*, *26*, 1205–1211. https://doi.org/10.1038/s41591-020-0962-9

Ferretti, L., Wymant, C., Kendall, M., Zhao, L., Nurtay, A., Abeler-Dörner, L., Parker, M., Bonsall, D., & Fraser, C. (2020). Quantifying SARS-CoV-2 transmission suggests epidemic control with digital contact tracing. *Science*, *368*(6491).

Fisman, D. N., & Tuite, A. R. (2021). Evaluation of the relative virulence of novel SARS-CoV-2 variants: a retrospective cohort study in Ontario, Canada. *CMAJ*.

Herrera-Esposito, D., & de los Campos, G. (2021). Age-specific rate of severe and critical SARS-CoV-2 infections estimated with multi-country seroprevalence studies. *MedRxiv*, https://doi.org/10.1101/2021.07.29.21261282. https://doi.org/https://doi.org/10.1101/2021.07.29.21261282

Hinch, R., Probert, W. J. M., Nurtay, A., Kendall, M., Wymant, C., Hall, M., Lythgoe, K., Bulas Cruz, A., Zhao, L., & Stewart, A. (2021). OpenABM-Covid19—An agent-based model for non-pharmaceutical interventions against COVID-19 including contact tracing. *PLoS Computational Biology*, *17*(7), e1009146.

James, A., Plank, M. J., Hendy, S., Binny, R. N., Lustig, A., & Steyn, N. (2021). Model-free estimation of COVID-19 transmission dynamics from a complete outbreak. *PLoS ONE*, *16*(3 March), 1–13. https://doi.org/10.1371/journal.pone.0238800

Kang, M., Xin, H., Yuan, J., Ali, S. T., Liang, Z., Zhang, J., Hu, T., Lau, E., Zhang, Y., & Zhang, M. (2021). Transmission dynamics and epidemiological characteristics of Delta variant infections in China. *MedRxiv*, https://doi.org/10.1101/2021.08.12.21261991. https://doi.org/https://doi.org/10.1101/2021.08.12.21261991

Lauer, S. A., Grantz, K. H., Bi, Q., Jones, F. K., Zheng, Q., Meredith, H. R., Azman, A. S., Reich, N. G., & Lessler, J. (2020). The incubation period of coronavirus disease 2019 (COVID-19) from publicly reported confirmed cases: estimation and application. *Annals of Internal Medicine*, *172*(9), 577–582.

Lloyd-Smith, J. O., Schreiber, S. J., Kopp, P. E., & Getz, W. M. (2005). Superspreading and the effect of individual variation on disease emergence. *Nature*, *438*(7066), 355–359.

Moore, S., Hill, E. M., Tildesley, M. J., Dyson, L., & Keeling, M. J. (2021). Vaccination and non-pharmaceutical interventions for COVID-19: a mathematical modelling study. *The Lancet Infectious Diseases*, *21*(6), 793–802.

Riou, J., & Althaus, C. L. (2020). Pattern of early human-to-human transmission of Wuhan 2019 novel coronavirus (2019-nCoV), December 2019 to January 2020. *Eurosurveillance*, *25*(4), 2000058.

Steyn, N., Plank, M. J., Binny, R. N., Hendy, S. C., Lustig, A., & Ridings, K. (2022). A COVID-19 vaccination model for Aotearoa New Zealand. *Scientific Reports*, *12*, 2720. https://doi.org/10.1038/s41598-022-06707-5

Twohig, K. A., Nyberg, T., Zaidi, A., Thelwall, S., Sinnathamby, M. A., Aliabadi, S., Seaman, S. R., Harris, R. J., Hope, R., & Lopez-Bernal, J. (2022). Hospital admission and emergency care attendance risk for SARS-CoV-2 delta (B. 1.617. 2) compared with alpha (B. 1.1. 7) variants of concern: a cohort study. *Lancet Infectious Diseases*, *22*, 35–42.

Wallinga, J., & Lipsitch, M. (2007). How generation intervals shape the relationship between growth rates and reproductive numbers. *Proceedings of the Royal Society B: Biological Sciences*, *274*(1609), 599–604. https://doi.org/10.1098/rspb.2006.3754

Zhang, M., Xiao, J., Deng, A., Zhang, Y., Zhuang, Y., Hu, T., Li, J., Tu, H., Li, B., & Zhou, Y. (2021). Transmission dynamics of an outbreak of the COVID-19 Delta variant B. 1.617. 2—Guangdong Province, China, May–June 2021. *China CDC Weekly*, *3*(27), 584–586.
